# Supplementary material
Source: publisher figshare collection journal article supplement (https://acs.figshare.com/ndownloader/files/12869027)
Supplement: Supplementary file 1 [file 12869027]

*Supplementary information*

# Cationic Hyperbranched Polymers with Biocompatible Shells for siRNA Delivery

*Sipei Li,<sup>a, ∇</sup>Maiko Omi,<sup>b, ∇</sup>Francis Cartieri,<sup>c</sup> Dominik Konkolewicz,<sup>d</sup> Gordon Mao,<sup>c</sup>*

*Haifeng Gao,<sup>e</sup> Saadyah E. Averick,<sup>\*,c</sup> Yuji Mishina,<sup>\*,b</sup> Krzysztof Matyjaszewski<sup>\*,a</sup>*

<sup>a</sup> Department of Chemistry, Carnegie Mellon University, 4400 Fifth Avenue, Pittsburgh, Pennsylvania 15213, USA

<sup>b</sup> Department of Biological and Materials Sciences, University of Michigan, 1011 N. University, Ann Arbor, Michigan, 48109, USA

<sup>c</sup> Allegheny Health Network - Neuroscience Disruptive Research Lab, 320 E North Ave, Pittsburgh, Pennsylvania 15212, USA

<sup>d</sup> Department of Chemistry and Biochemistry, Miami University, 651 E High St, Oxford, Ohio, 45056, USA

<sup>e</sup> Department of Chemistry and Biochemistry, University of Notre Dame, 305C McCourtney Hall, Notre Dame, Indiana, 46556, USA

## 1. Calculation of Degree of Branching (DB)

The calculation was based on previous reports.<sup>1-3</sup> Figure S1 shows the <sup>1</sup>H NMR of a hyperbranched polymer (HBP) with DB of 34 % purified with dialysis.

The HBP structure is composed of five different moieties (Scheme S1):

Structure A: unreacted vinyl group

Structure a: reacted vinyl group

Structure b: reacted initiating site

Structure A\*: newly formed initiating site

Structure B\*: original initiating site

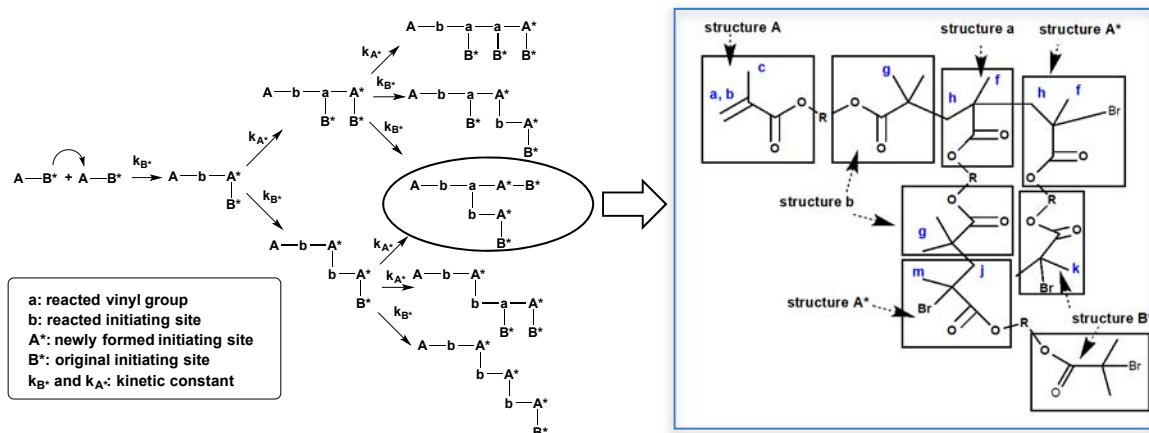

**Scheme S1.** Illustration of all moieties of the HBP with rate constants,  $k_{A^*}$  and  $k_{B^*}$  in the initial steps in the polymerization. ( $r = k_{A^*}/k_{B^*}$ )

Relative amounts of each moiety in the HBP structure was calculated by integration of NMR peaks shown in Figure S1:

$$\text{Area}(j) = 2N_{A^*};$$

$$\text{Area}(c+f+g+h+k+m) = 3N_a + 6N_b + 3N_{A^*} + 6N_{B^*} + 2N_a + 3N_{A^*};$$

$$\text{Area}(a+b) = 2N_{A^*};$$

$$N_{A^*} = N_b;$$

$$N_{B^*} = N_a + N_{A^*};$$

With the above six equations,  $N_{B^*}$  and  $N_B$  can be calculated. Since conversion of

vinyl groups approached essentially 100 %, Conv. A was assumed as 1, to simplify the calculation.<sup>1, 2</sup> With the calculated results, DB can be calculated according to the following equations:

$$f_{B^*} = \frac{N_{B^*}}{N_{B^*} + N_B}$$

$$r = \frac{\text{Conv. A} + f_{B^*} - 1}{-\ln f_{B^*} + f_{B^*} - 1} = \frac{e^{-z}}{e^{-z} + z - 1}$$

$$DB = 2e^{-z}(1 - e^{-z})$$

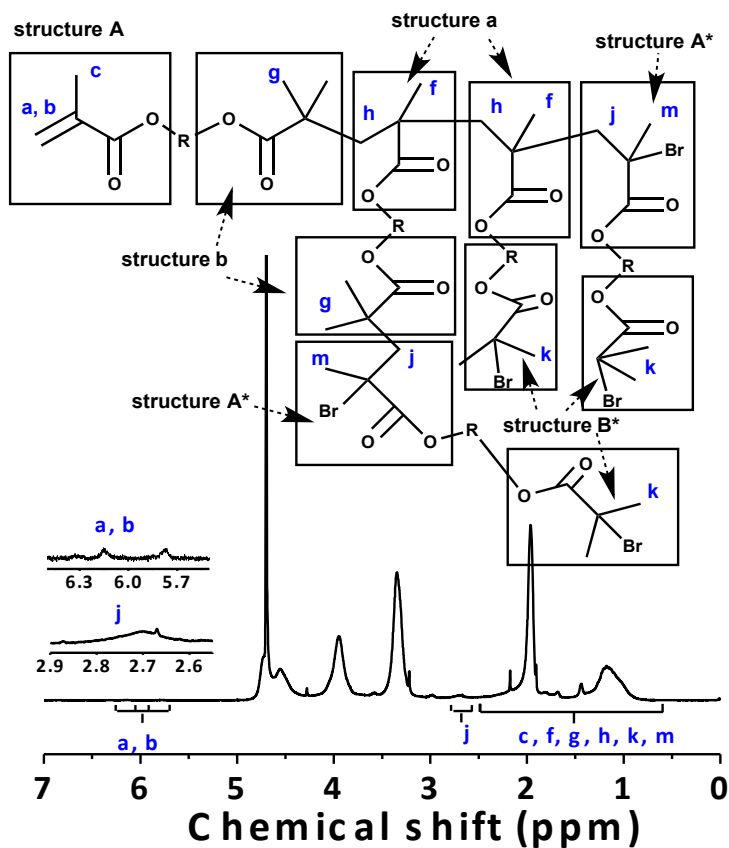

**Figure S1.** <sup>1</sup>H NMR spectrum of HBP (DB=34 %) with assigned NMR peaks.

The relative NMR integrations of Area(**j**), Area(**c+f+g+h+k+m**) and Area(**a+b**) for HBP with different DB are listed below in Table S1.

**Table S1.** Relative NMR integration areas and calculated DB.

| Polymers | Area( <b>j</b> ) | Area( <b>c+f+g+h+k+m</b> ) | Area( <b>a+b</b> ) | DB   |
|----------|------------------|----------------------------|--------------------|------|
| HBP-1    | 1                | 27.0                       | 0.026              | 34 % |
| HBP-2    | 1                | 43.4                       | 0.151              | 22 % |
| HBP-3    | 1                | 67.1                       | 0.099              | 16 % |

## 2. Characterization of cationic hyperbranched polymers (HBP).

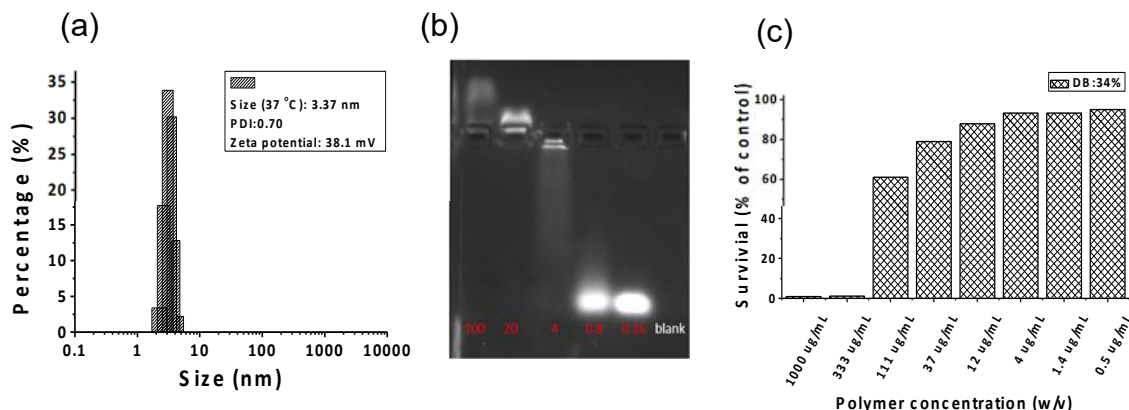

**Figure S2.** (a) Volume-mean size distribution by DLS of cationic HBP with DB 34%. (b) Agarose gel analysis of cationic HBP/siRNA complexes (weight ratio of polymer/siRNA from left to right: 100/1, 20/1, 4/1, 0.5/1, 0.16/1 and blank) (c) Cytotoxicity data of cationic HBP with SH-SY5Y cell. The polymer became toxic at concentration over 333  $\mu$ g/mL, indicating that a biocompatible corona is needed to reduce the toxicity of the naked cationic core.

## 3. Characterization of core-shell structures.

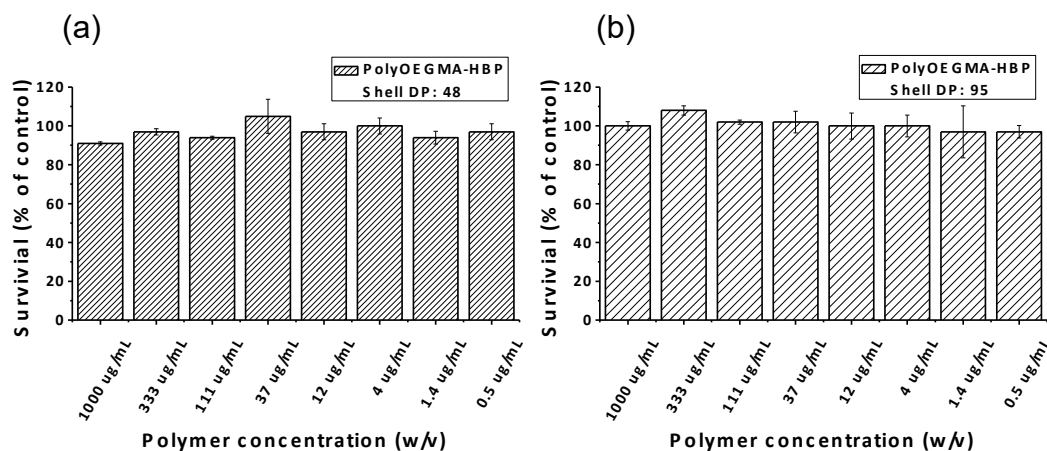

**Figure S3.** Cytotoxicity of the polyOEGMA-HBP polymers with different shell DPs grafted from a cationic core with DB of 34 %. (cells tested: SH-SY5Y) (a) Shell DP=48, (b) shell DP=95.

Core-shell structure polyOEGMA-HBP with thicker corona (shell DP = 48 or 95)

also showed low cytotoxicity towards cell SH-SY5Y with concentration up to 1 mg/mL.

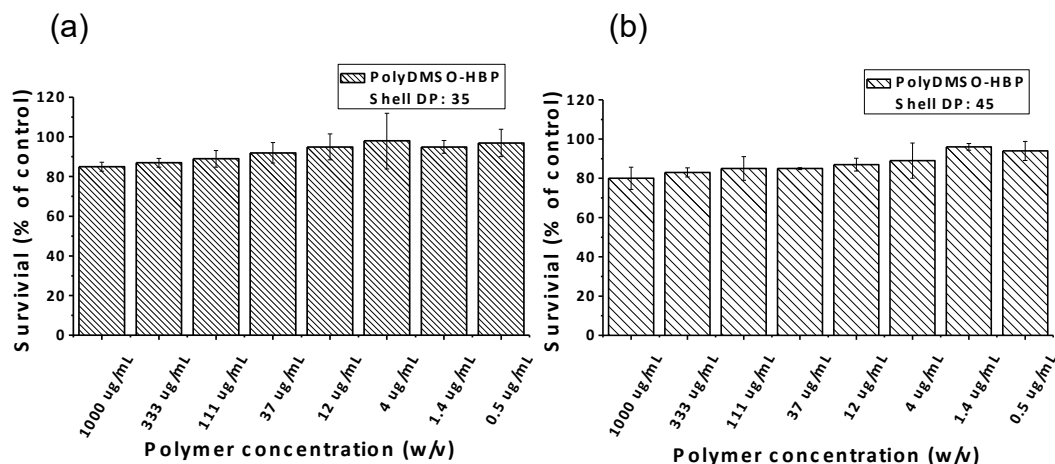

**Figure S4.** Cytotoxicity of the polyDMSO-HBP polymers with different shell DPs grafted from a cationic core with DB of 34 %. (cells tested: SH-SY5Y) (a) Shell DP=35, (b) shell DP=45.

Similarly, core-shell structure polyDMSO-HBP with thicker corona (shell DP = 35 or 45) also showed low cytotoxicity towards cell SH-SY5Y with concentration up to 1 mg/mL. These results suggest that polyDMSO provides biocompatible systems.

The siRNA complexing ability of polyOEGMA-HBP and polyDMSO-HBP with thicker corona was examined using agarose gel (Figure S5). PolyOEGMA-HBP with a shell DP of 48 did not show complexation with siRNA at weight ratio of polymer/siRNA lower than 200/1 and no complexes was formed even at a weight ratio of 400/1 for polyOEGMA-HBP with shell DP of 95. In comparison, polyDMSO-HBP with shell DP of 45 started to form complexes at a weight ratio of 40/1 (5 times lower than polyOEGMA-HBP with similar shell DP). This results indicated that due to the lower steric hindrance of polyDMSO, core-shell structures polyDMSO-HBP was more efficient than polyOEGMA-HBP for complexing siRNA.

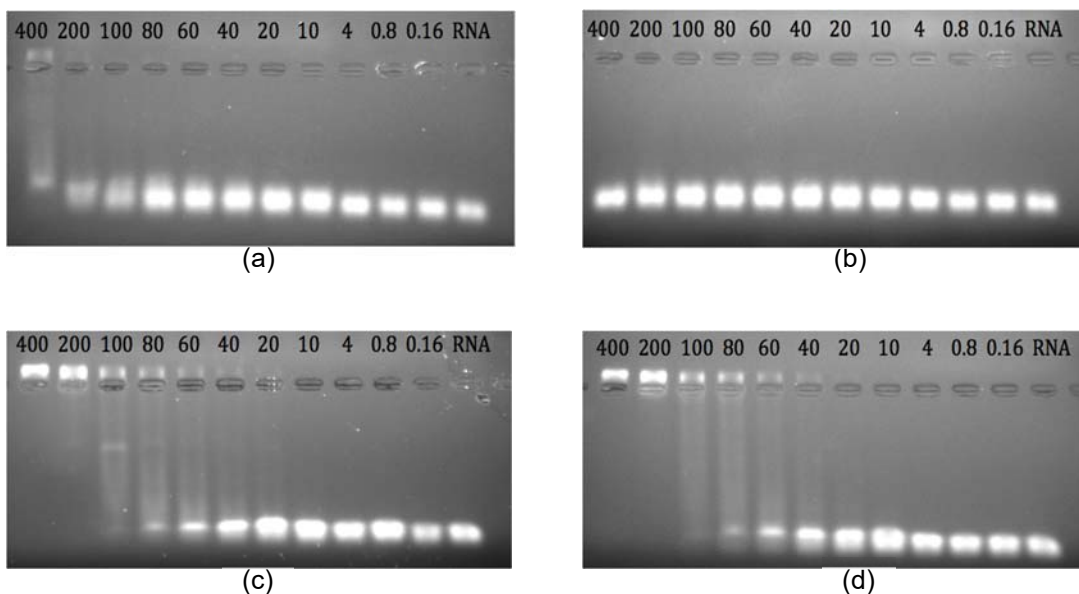

**Figure S5.** Agarose gel analysis of core-shell structure polyOEGMA-HBP with shell DP 48 (a) and 95(b); agarose gel of core-shell structure polyDMSO-HBP with shell DP 35 (c) and 48(d). Weight ratios of polymer/siRNA range from 0.16/1 to 400/1.

#### 4. Stability of siRNA complexes

The stability of siRNA polyplexes was assessed by agarose gel electrophoresis. The result showed that the incubation of naked siRNA with culture media containing 10% FBS resulted in clear bands for 4h, and after 12 h, blurred bands were observed up to 48 h (Figure S6a). For polyOEGMA-HBP, siRNA complexes were stuck in the wells and prevented the internalization of siRNA into agarose gel, but the bands became blurred after 12 h (Figure S6b). By contrast, polyDMSO-HBP/siRNA polyplexes showed slightly blurred bands after 12 h, but the formation of polyplexes remained detectable up to 48 h (Figure S6c). No free siRNA was observed both in polyOEGMA-HBP and polyDMSO-HBP polyplexes up to 48 h. These results suggest that polyDMSO-HBP polyplexes are more stable than polyOEGMA polyplexes in culture media containing 10% FBS.

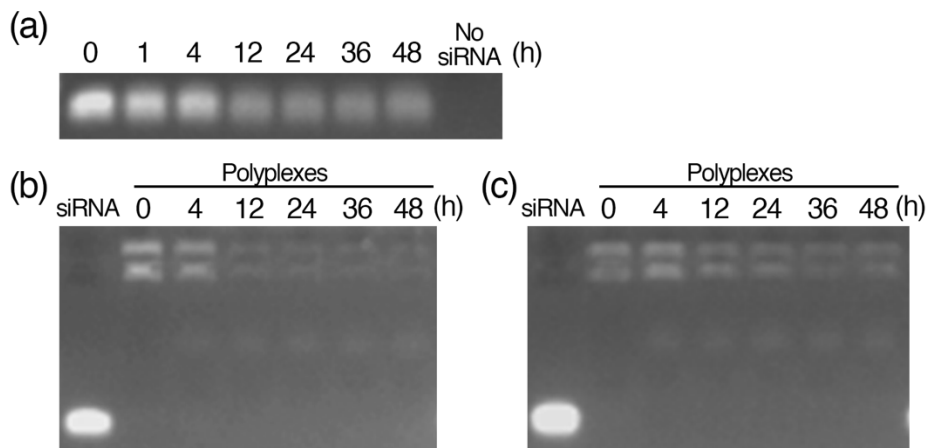

**Figure S6.** The stability of siRNA polyplexes in culture media containing 10% FBS up to 2 days. (a) Naked siRNA, (b) polyOEGMA-HBP and (c) polyDMSO-HBP at polymer/siRNA weight ratio of 400/1 were incubated for 4, 12, 24, 36 and 48 h at 37 °C. The stability of complexes was analyzed by electrophoresis on agarose gel stained with ethidium bromide. For better comparison, each gel was put in the same image.

## 5. siRNA delivery for gene knockdown

As shown in Figure S7, for HBP core, polymer/siRNA weight ratios ranging from 5/1 to 20/1 caused significant reductions in *Runx2* expression of  $53.6 \pm 15.7 \%$  ( $p < 0.05$ ) and  $72.3 \pm 15.3 \%$  ( $p < 0.01$ ), respectively. This is likely due to the toxic effects caused by HBP core, based on the results shown in Figure 5, and thus non-specific reductions in gene expression.

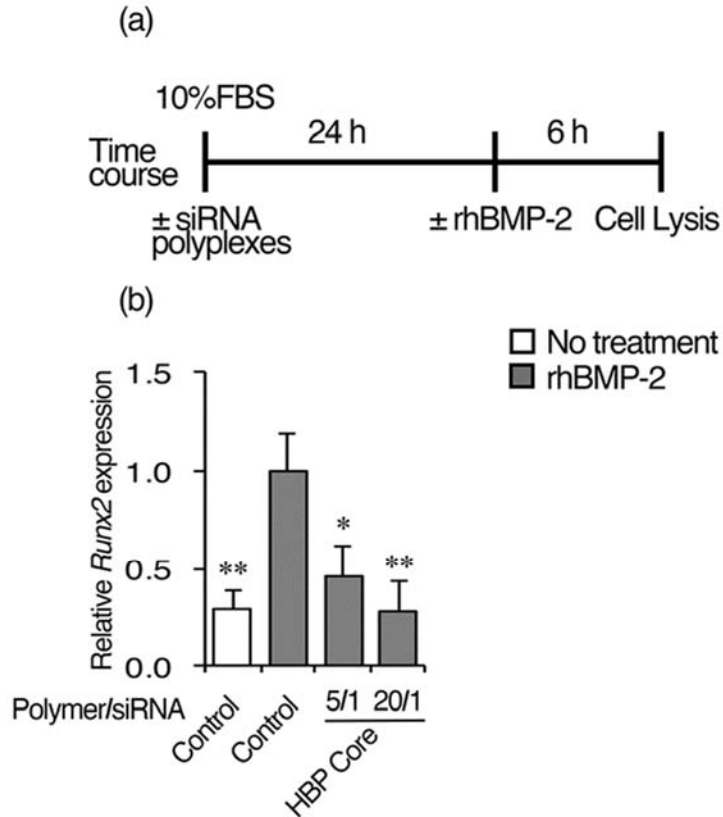

**Figure S7.** The HBP core-based RNAi against *Runx2* in primary osteoblasts by delivery of *Runx2* siRNAs at 20 pM doses. (a) Schematic of experimental time course. The siRNA polyplexes were delivered 24 h prior to delivery of recombinant human bone morphogenetic protein 2 (rhBMP-2, 100 ng/mL). Analysis of mRNA expression was conducted after 6 h of treatment by rhBMP-2. (b) The effects on *Runx2* mRNA expressions by HBP Core/siRNAs polyplexes. The polymer/siRNA weight ratios ranging from 5/1 to 20/1 elicited significant reductions in *Runx2* expression. Data expressed as mean  $\pm$  SD of three replicate determinations. \*\* $p < 0.01$ , \* $p < 0.05$ , vs rhBMP-2 treated cells without siRNA.

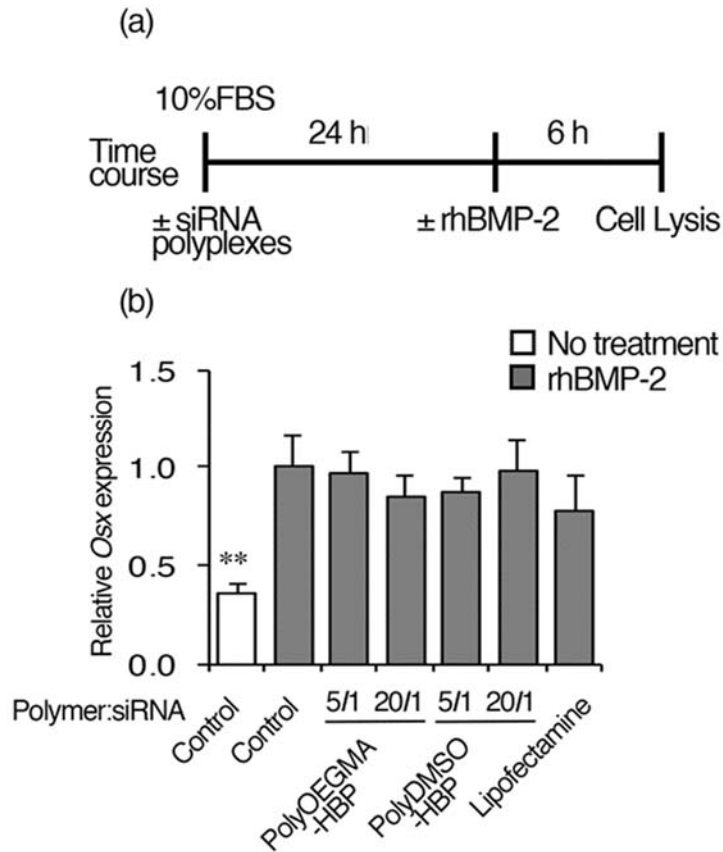

**Figure S8.** Delivery of *Runx2* siRNAs with core-shell structured polymers had no significant effect on *Osx* expression at 6 h after the treatment. (a) Schematic of experimental time course. The siRNA polyplexes were delivered 24 h prior to delivery of rhBMP-2. (b) Gene silencing effects on *Osx* mRNA expressions as a consequence of RNAi targeting *Runx2*. This result indicated that RNAi using core-shell structured polymers allows targeted gene-specific silencing. Data expressed as mean  $\pm$  SD of three replicate determinations. \*\* $p < 0.01$ , vs rhBMP-2 treated cells without siRNA.

The *Runx2* siRNA delivery with core-shell structured polymers had no significant effect on *Osx* expression at 6 h after the treatment (Figure S8), indicating that RNAi using polymers developed here allows targeted gene-specific silencing.

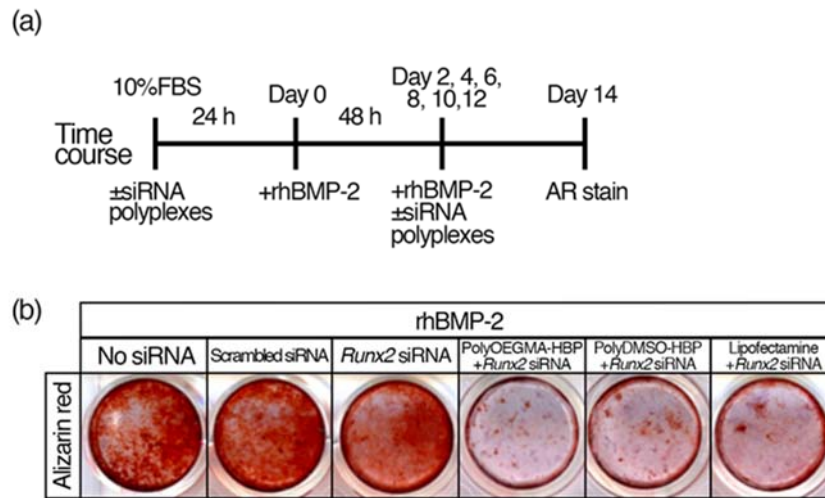

**Figure S9.** Alizarin red staining was performed after siRNA against *Runx2* transfections. (a) Schematic of experimental time course. RNAi treatments against *Runx2* were delivered 24 h prior to delivery of rhBMP-2. Cell culture media were refreshed in conjunction with RNAi treatments and rhBMP-2 every 2 days for the duration of the study. After 14 d in culture, mineral deposition in osteoblasts was assessed by Alizarin red staining. (b) The cells receiving rhBMP-2 treatments with *Runx2* siRNA alone had no significant effect on mineral deposition compared to rhBMP-2 treated cells without siRNAs. RNAi treatments against *Runx2* with PolyOEGMA-HBP and PolyDMSO-HBP, a polymer/siRNA weight ratio at 5/1, resulted in significant reductions in mineral deposition in osteoblasts compared to cells receiving rhBMP-2 treatments without siRNA.

As shown above, cells treated with *Runx2* siRNA alone had no significant effect on mineral deposition compared to cell not treated with siRNAs, indicating the knockdown process requires the co-delivery of cationic polymers.

## 5. References

- (1) Yan, D.; Müller, A. H. E.; Matyjaszewski, K. Molecular Parameters of Hyperbranched Polymers Made by Self-Condensing Vinyl Polymerization. 2. Degree of Branching. *Macromolecules* **1997**, *30*, 7024-7033.
- (2) Min, K.; Gao, H. New Method to Access Hyperbranched Polymers with Uniform Structure Via One-Pot Polymerization of Inimer in Microemulsion. *J. Am. Chem. Soc.* **2012**, *134*, 15680-15683.
- (3) Graff, R. W.; Wang, X.; Gao, H. Exploring Self-Condensing Vinyl Polymerization of Inimers in Microemulsion to Regulate the Structures of Hyperbranched Polymers. *Macromolecules* **2015**, *48*, 2118-2126.
